# Supplementary material for: Co-caged gold nanoclusters and methyl motifs lead to detoxification of dendrimers and allow cytosolic access for siRNA transfection
Source: Royal Society of Chemistry journal article supplement (doi:10.1039/c4tb01153h), 2014-01-01
Supplement: c4tb01153h1.pdf [file c4tb01153h1.pdf]

## Electronic Supplementary Information (ESI)

### Co-caged Gold-Nanoclusters and Methyl-Motifs Lead to Detoxification of Dendrimers and Allow Cytosolic Access for siRNA Transfection

Chih-Te Chien,<sup>a</sup> Chia-Yeh Liu,<sup>a</sup> Zong-Wei Wu,<sup>a</sup> Pin-Jyun Chen,<sup>a</sup> Ching-Liang Chu<sup>\*b</sup> and Shu-Yi Lin<sup>\*a</sup>

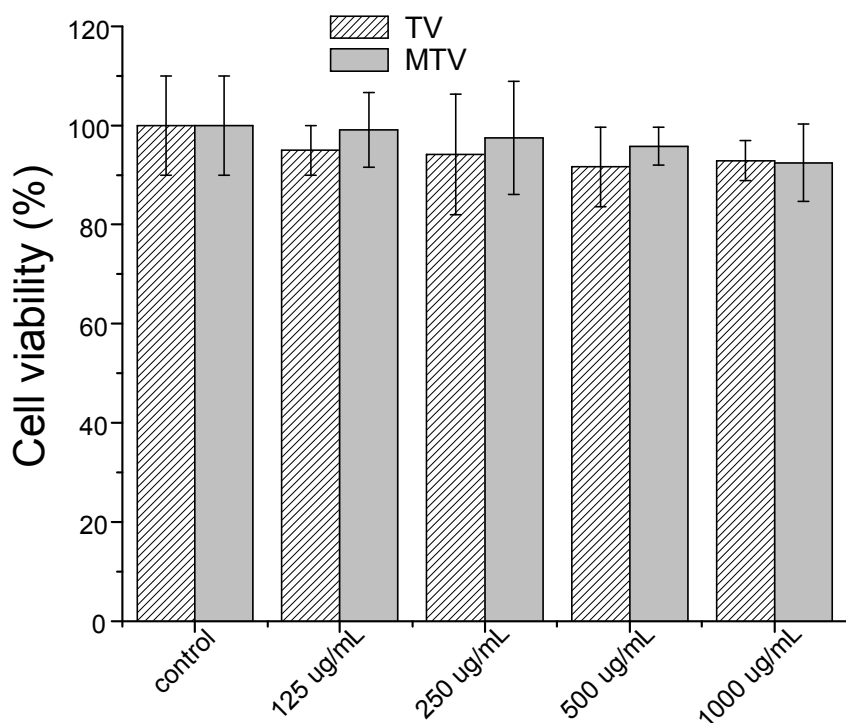

Fig. S1 The cytotoxicity of DCs was evaluated by WST-1 assay after treatment with TV and MTV for 24 h.

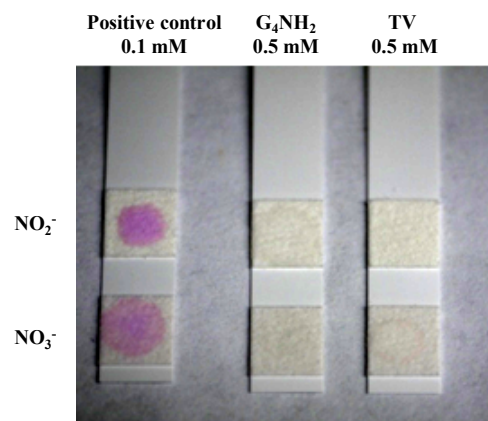

Fig. S2 To examine the oxidization possibility of 1°-amines form dendrimers.

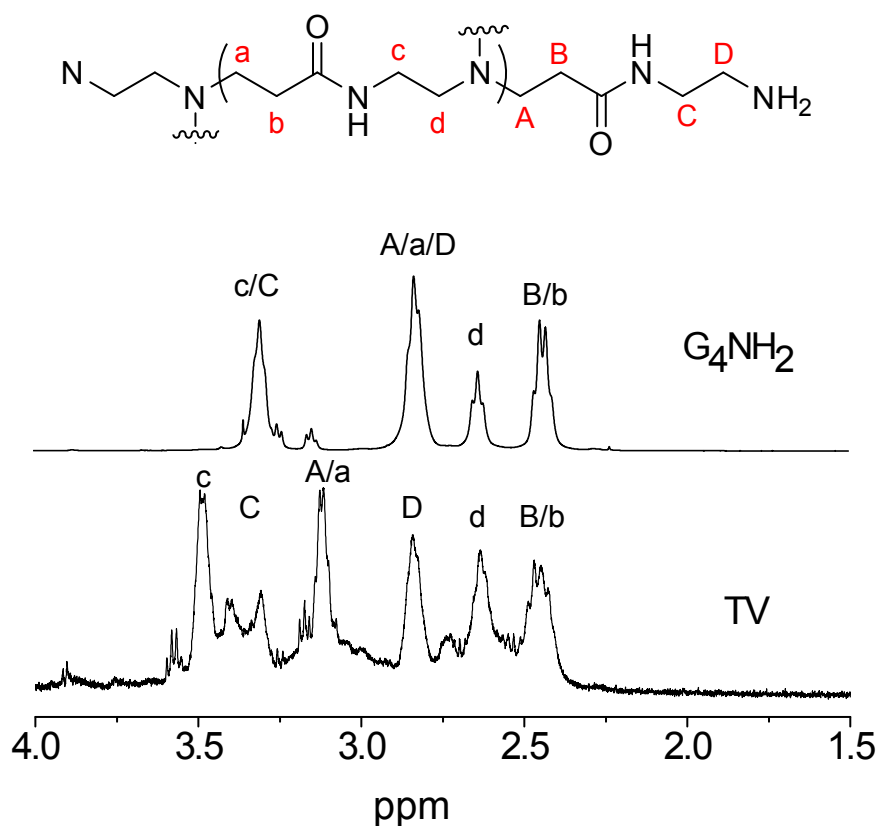

Fig. S3 Top panel: a schematic representation of  $\text{G}_4\text{NH}_2$  from the core to the branch. Bottom panel: the  $^1\text{H}$  NMR spectra of  $\text{G}_4\text{NH}_2$  and TV, respectively. Note that the assignment of  $\text{G}_4\text{NH}_2$  was referenced a previous paper (J. Am. Chem. Soc. 2013, 135, 11513-11516).

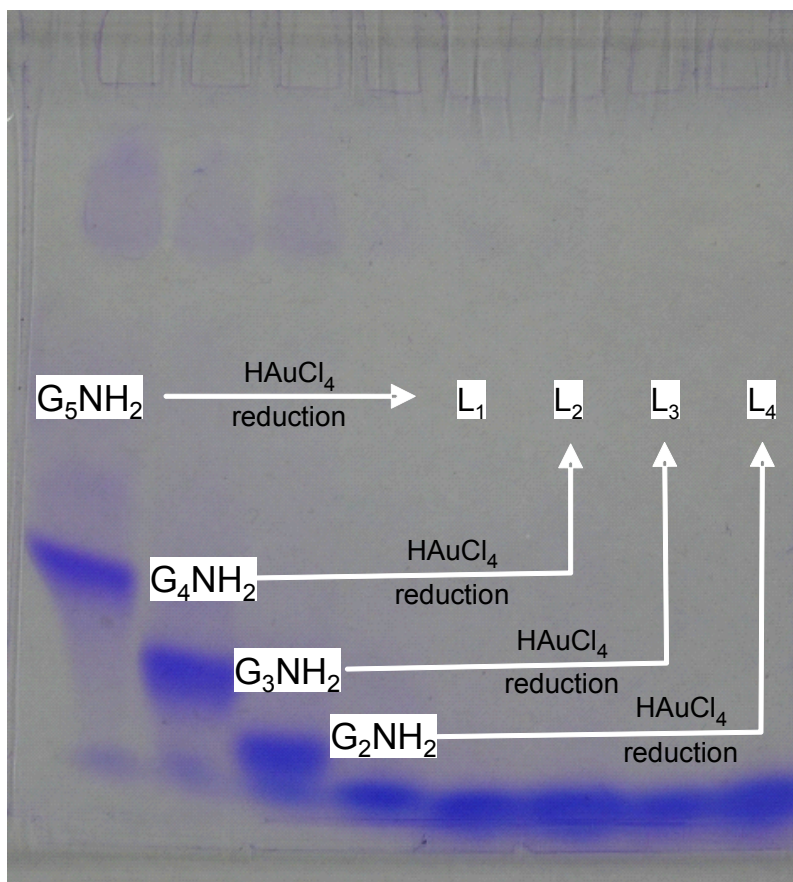

Fig. S4 A comparison of the sizes of various TVs derived form dendrimers with smaller and larger generations.

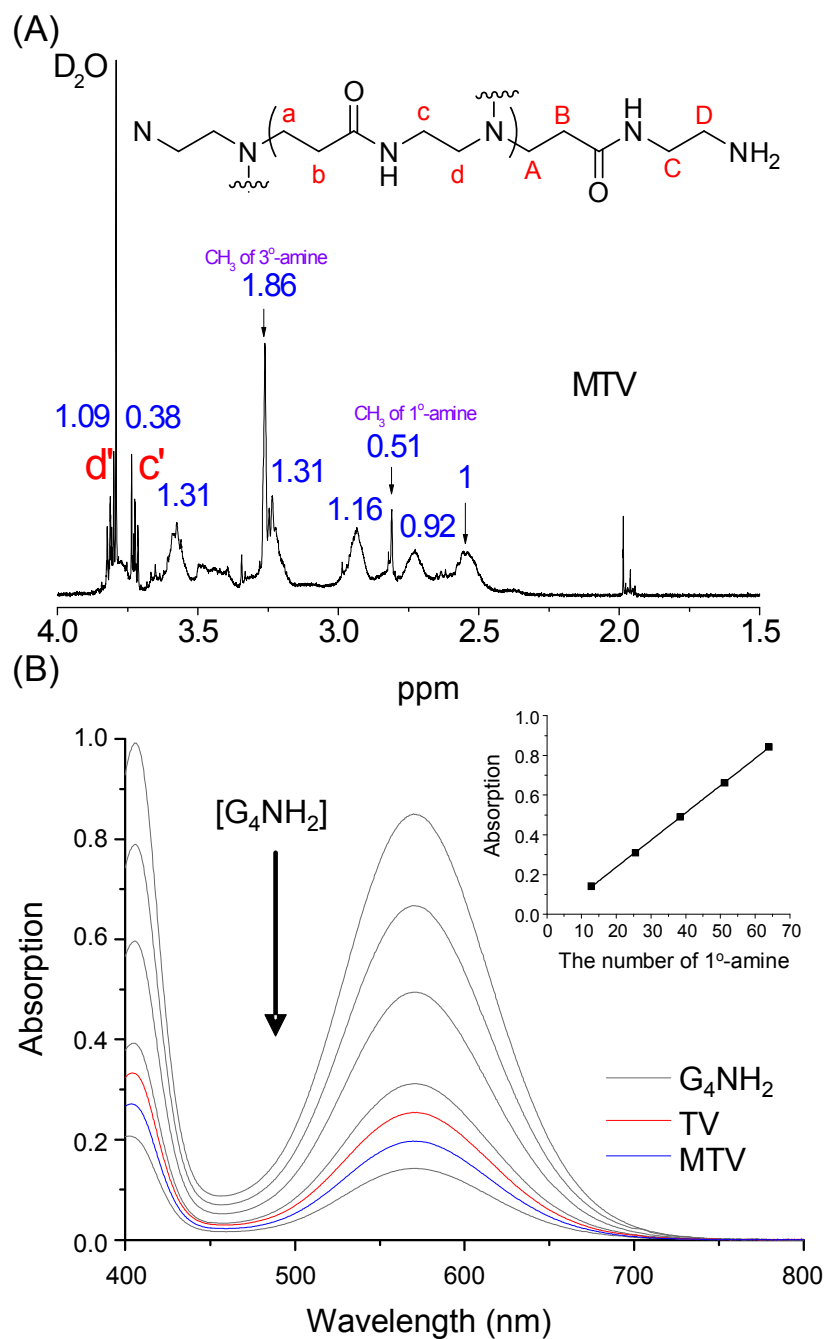

Fig. S5 (A)  $^1\text{H}$  NMR spectrum of MTV. The values are labeled to represent the relative integral of protons. (B) The result of the ninhydrin test. The inset shows a plot of the absorption of ninhydrin dye versus the number of 1°-amine of dendrimers.

Table S1 A summary of the percentage and number of 1°-amine from TV and MTV

|                                  | TV     | MTV     |
|----------------------------------|--------|---------|
| Absorption at $\lambda = 560$ nm | 0.2528 | 0.19623 |
| Percentage (%)                   | 33     | 27      |
| Number of 1°-amine               | 21     | 17      |

According to the Figure S3, the calculations are shown below:

$$H_{\text{number}} \text{ of } 3^\circ\text{-amine} : H_{\text{number}} \text{ of } 1^\circ\text{-amine} = (1.86-1.31) : 0.51 = 1.08 : 1$$

$$N_{\text{number}} \text{ of } 3^\circ\text{-amine} : N_{\text{number}} \text{ of } 1^\circ\text{-amine} = (1.86/3) : (1/9) = X : (21-17)$$

$$N_{\text{number}} \text{ of } 3^\circ\text{-amine} = X = 13$$

$$\text{Percentage of } 3^\circ\text{-amine with methyl-motifs} = 13/62 = 21 \%$$

$$\text{Percentage of } 1^\circ\text{-amine with methyl-motifs} = 4/21 = 19 \%$$

Table S2 Calculation and comparison of the buffer capacity of the TV and MTV.

|                                                          | TV                    | MTV                   |
|----------------------------------------------------------|-----------------------|-----------------------|
| (1) Molecular weight                                     | 15786                 | 18312                 |
| (2) weight                                               | 5 mg                  | 5 mg                  |
| (3) mole                                                 | $3.17 \times 10^{-7}$ | $2.73 \times 10^{-7}$ |
| (4) total protons of 1°-amine                            | 21                    | 17                    |
| (5) total protons of 3°-amine                            | 62                    | 49                    |
| (6) total mole of amines (mol N)                         | $2.63 \times 10^{-5}$ | $1.80 \times 10^{-5}$ |
| (7) titration volume ( $\Delta V$ )*                     | 8.7 $\mu\text{L}$     | 7.9 $\mu\text{L}$     |
| (8) concentration of HCl                                 | 1.0 M                 | 1.0 M                 |
| (9) Buffer capacity (%)                                  |                       |                       |
| $\frac{\Delta V \times 1.0M}{\text{mol N}} \times 100\%$ | 33.1 %                | 43.9 %                |

Note :

mol N =  $(21 + 62) \times 3.17 \times 10^{-7} = 2.63 \times 10^{-5}$  for TV

mol N =  $(17 + 49) \times 2.73 \times 10^{-7} = 1.80 \times 10^{-5}$  for MTV

\*  $\Delta V = V_{\text{pH (at 7.4)}} - V_{\text{pH (at 5.1)}}$ , the titration volume is adopted from the following figure:

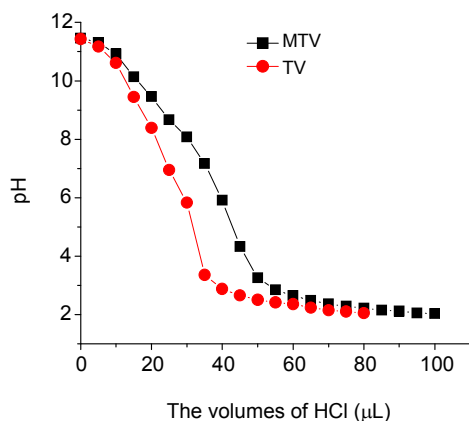

Reference: M. Piest; Engbersen J. F. J., *J. Controlled Release* **2010**, 148, 83-90.

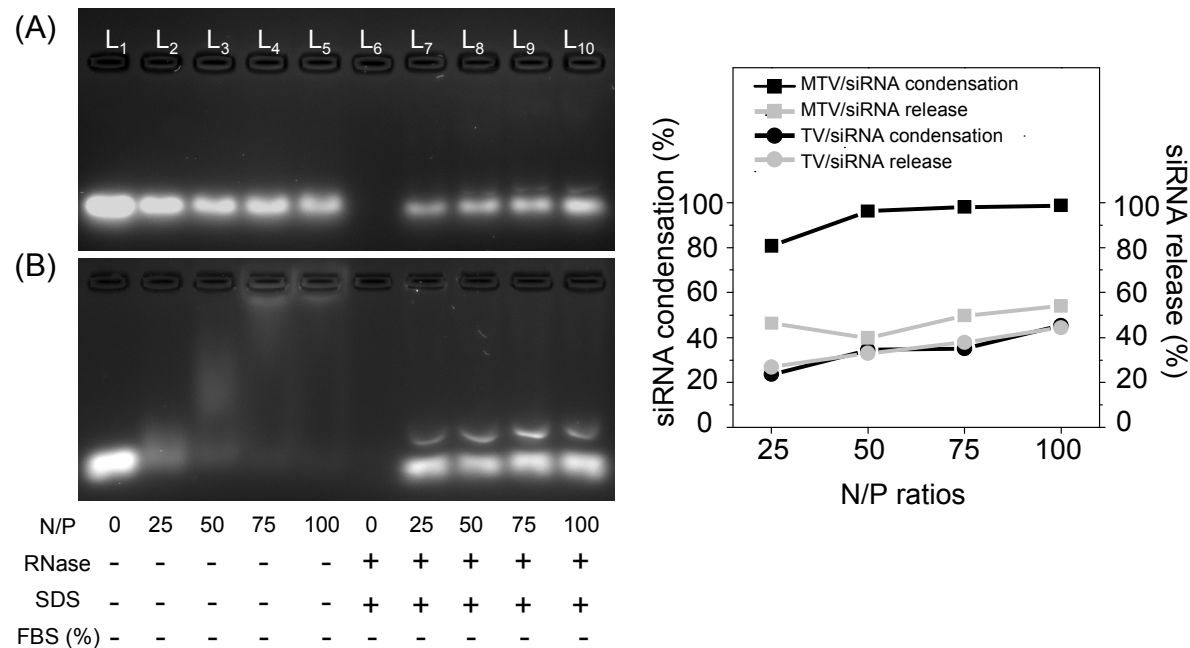

Fig. S6 The efficiency of siRNA condensation and release was evaluated. Panels (A) and (B) represent the agarose gel electrophoresis of TV/siRNA complexes and MTV/siRNA complexes, respectively. The efficiency of siRNA protection and release from two sets of complexes were plotted at various N/P ratios as a function showing in the right lower panel.

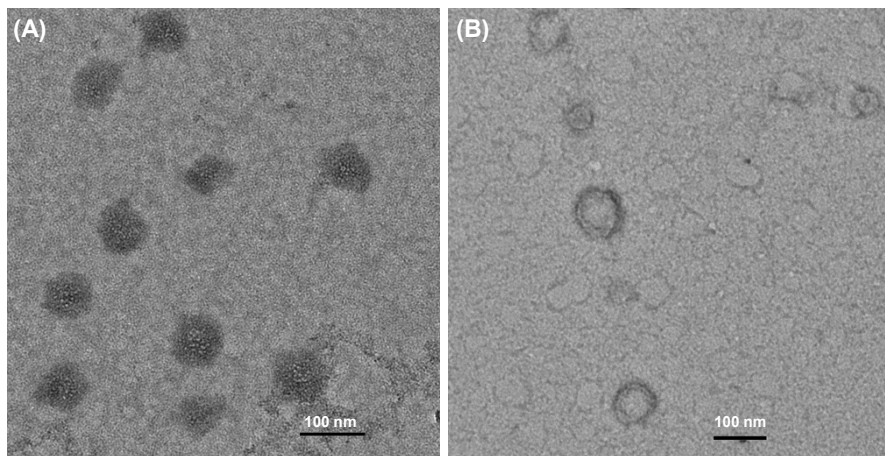

Fig. S7 TEM photographs of (A) TV/siRNA and (B) MTV/siRNA complexes. The samples were deposited on the carbon coated grid and then stained with 2% phosphotungsten acid.
